1 **ChAdOx1 nCoV-19 vaccination prevents SARS-CoV-2 pneumonia in rhesus macaques**

2  
3 Neeltje van Doremalen<sup>1\*</sup>, Teresa Lambe<sup>2\*</sup>, Alexandra Spencer<sup>2</sup>, Sandra Belij-Rammerstorfer<sup>2</sup>,  
4 Jyothi N. Purushotham<sup>1,2</sup>, Julia R. Port<sup>1</sup>, Victoria Avanzato<sup>1</sup>, Trenton Bushmaker<sup>1</sup>, Amy  
5 Flaxman<sup>2</sup>, Marta Ulaszewska<sup>2</sup>, Friederike Feldmann<sup>3</sup>, Elizabeth R. Allen<sup>2</sup>, Hannah Sharpe<sup>2</sup>,  
6 Jonathan Schulz<sup>1</sup>, Myndi Holbrook<sup>1</sup>, Atsushi Okumura<sup>1</sup>, Kimberly Meade-White<sup>1</sup>, Lizzette  
7 Pérez-Pérez<sup>1</sup>, Cameron Bissett<sup>2</sup>, Ciaran Gilbride<sup>2</sup>, Brandi N. Williamson<sup>1</sup>, Rebecca Rosenke<sup>3</sup>,  
8 Dan Long<sup>3</sup>, Alka Ishwarbhai<sup>2</sup>, Reshma Kailath<sup>2</sup>, Louisa Rose<sup>2</sup>, Susan Morris<sup>2</sup>, Claire Powers<sup>2</sup>,  
9 Jamie Lovaglio<sup>3</sup>, Patrick W. Hanley<sup>3</sup>, Dana Scott<sup>3</sup>, Greg Saturday<sup>3</sup>, Emmie de Wit<sup>1</sup>, Sarah C.  
10 Gilbert<sup>2#</sup>, Vincent J. Munster<sup>1#</sup>.

11  
12 *1. Laboratory of Virology, National Institute of Allergy and Infectious Diseases, National*

13 *Institutes of Health, Hamilton, MT, USA.*

14 *2. The Jenner Institute, University of Oxford, Oxford, UK*

15 *3. Rocky Mountain Veterinary Branch, National Institute of Allergy and Infectious*

16 *Diseases, National Institutes of Health, Hamilton, MT, USA*

17  
18 \*Joint first authors

19 #Joint senior authors

20 **Severe acute respiratory syndrome coronavirus-2 (SARS-CoV-2) emerged in December**  
21 **2019<sup>1,2</sup> and is responsible for the COVID-19 pandemic<sup>3</sup>. Vaccines are an essential**  
22 **countermeasure urgently needed to control the pandemic<sup>4</sup>. Here, we show that the**  
23 **adenovirus-vectored vaccine ChAdOx1 nCoV-19, encoding the spike protein of SARS-**  
24 **CoV-2, is immunogenic in mice, eliciting a robust humoral and cell-mediated response.**  
25 **This response was not Th2 dominated, as demonstrated by IgG subclass and cytokine**  
26 **expression profiling. A single vaccination with ChAdOx1 nCoV-19 induced a humoral and**  
27 **cellular immune response in rhesus macaques. We observed a significantly reduced viral**  
28 **load in bronchoalveolar lavage fluid and respiratory tract tissue of vaccinated animals**  
29 **challenged with SARS-CoV-2 compared with control animals, and no pneumonia was**  
30 **observed in vaccinated rhesus macaques. Importantly, no evidence of immune-enhanced**  
31 **disease following viral challenge in vaccinated animals was observed. ChAdOx1 nCoV-19 is**  
32 **currently under investigation in a phase I clinical trial. Safety, immunogenicity and efficacy**  
33 **against symptomatic PCR-positive COVID-19 disease will now be assessed in randomised**  
34 **controlled human clinical trials.**

35

## 36 **Main**

37 We previously demonstrated that a single dose of ChAdOx1 MERS, a chimpanzee adeno  
38 (ChAd)-vectored vaccine platform encoding the spike protein of MERS-CoV, protected non-  
39 human primates (NHPs) against MERS-CoV-induced disease<sup>5</sup>. Here, we designed a ChAdOx1-  
40 vectored vaccine encoding a codon-optimised full-length spike protein of SARS-CoV-2  
41 (YP\_009724390.1) with a human tPA leader sequence, provisionally named ChAdOx1 nCoV-  
42 19, similar to the approach for ChAdOx1 MERS<sup>5</sup>.

43

#### 44 **Immunogenicity in mice**

45 Two mouse strains (BALB/c, N=5 and outbred CD1, N=8) were vaccinated intramuscularly (IM)  
46 with ChAdOx1 nCoV-19 or ChAdOx1 GFP, a control vaccine expressing green fluorescent  
47 protein. Humoral and cellular immunity were studied 9-14 days later. Total IgG titers were  
48 detected against spike protein subunits S1 and S2 in all vaccinated mice (Figure 1a). Profiling of  
49 the IgG subclasses showed a predominantly Th1 response post vaccination (Extended Data  
50 Figure 1a). Virus-specific neutralising antibodies were detected in all mice vaccinated with  
51 ChAdOx1 nCoV-19, whereas no neutralisation was detected in serum from mice vaccinated with  
52 ChAdOx1 GFP (Figure 1b). Splenic T-cell responses measured by IFN- $\gamma$  ELISpot and  
53 intracellular cytokine staining (ICS) were detected against peptides spanning the full length of  
54 the spike construct (Figure 1c). Again, a strong Th1-type response was detected post vaccination  
55 as supported by high levels of IFN- $\gamma$  and TNF- $\alpha$ , and low levels of IL-4 and IL-10 (Figure 1d &  
56 Extended Data Figure 1b-c).

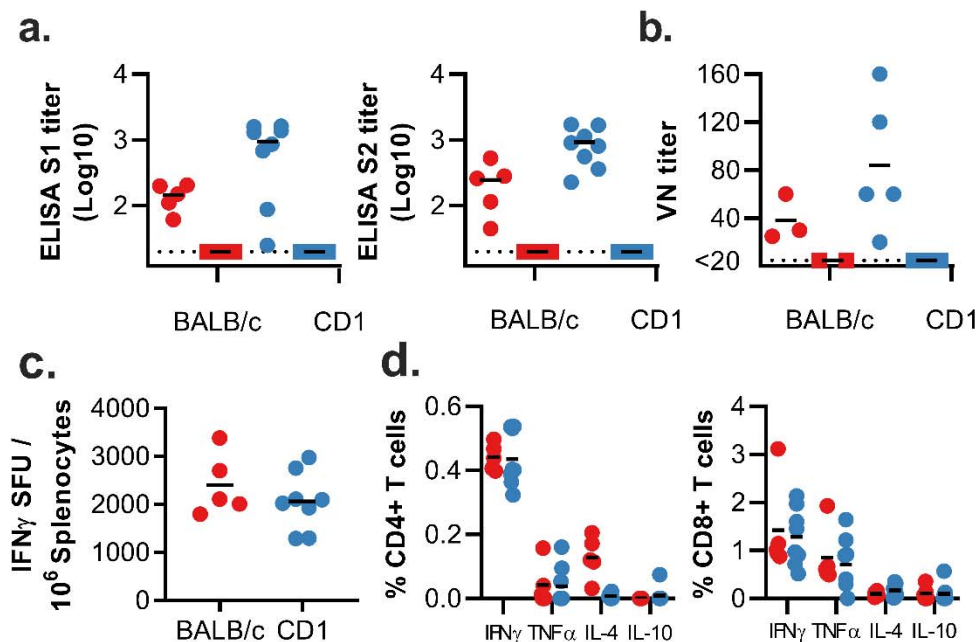

57

58 **Figure 1: Humoral and cellular immune responses to ChAdOx1 nCoV-19 vaccination in**  
59 **mice.**

60 a. End point titer of serum IgG detected against S1 or S2 protein. Control mice were below the  
61 limit of detection. b. Virus neutralizing titer in serum. c. Summed IFN- $\gamma$  ELISpot responses in  
62 splenocytes toward peptides spanning the spike protein. Control mice had low (<100 SFU) or no  
63 detectable response. d. Summed frequency of spike-specific cytokine positive CD4+ or CD8+ T  
64 cells. BALB/c = red; CD1 = blue; vaccinated = circle; control = square; dotted line = limit of  
65 detection; line = mean; SFU = spot-forming units.

66

### 67 **Immunogenicity in rhesus macaques**

68 We next evaluated the efficacy of ChAdOx1 nCoV-19 in rhesus macaques, a non-human primate  
69 model that displays robust infection of upper and lower respiratory tract and virus shedding upon  
70 inoculation with SARS-CoV-2<sup>6</sup>. Twenty-eight days before challenge, 6 animals were vaccinated

71 intramuscularly with  $2.5 \times 10^{10}$  ChAdOx1 nCoV-19 virus particles each, half of the dose  
72 currently administered in human clinical trials. As a control, three animals were vaccinated via  
73 the same route with the same dose of ChAdOx1 GFP (Figure 2a). Spike-specific antibodies were  
74 present as early as 14 days post vaccination and endpoint IgG titers of 400-6400 were measured  
75 on the day of challenge (Figure 2b). Virus-specific neutralising antibodies were detectable in all  
76 vaccinated animals before challenge (VN titer = 5-40), whereas no virus-specific neutralising  
77 antibodies were detected in control animals (Figure 2c). Finally, SARS-CoV-2 spike specific T-  
78 cell responses were detected by IFN- $\gamma$  ELISpot assay and involved stimulation of peripheral  
79 blood mononuclear cells (PBMCs) with a peptide library spanning the full length of the spike  
80 protein (Figure 2d).

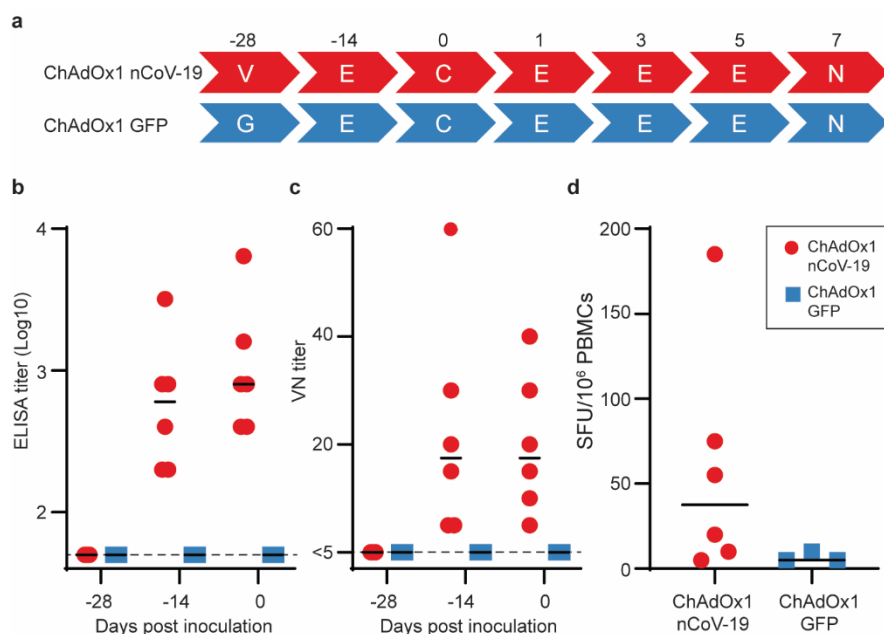

81  
82 **Figure 2. Humoral and cellular immune responses to ChAdOx1 nCoV-19 vaccination in**  
83 **rhesus macaques.**

84 a. Study schedule for NHPs. V = vaccination with ChAdOx1 nCoV-19; G = vaccination with  
85 ChAdOx1 GFP; E = exam; N = exam and necropsy. b. Virus neutralizing titer in serum. d.

86 Summed IFN- $\gamma$  ELISpot responses in PBMCs toward peptides spanning the spike protein  
87 Vaccinated animals = red circles; control animals = blue squares; dotted line = limit of detection;  
88 line – median; SFU = spot-forming units.

89

## 90 **Clinical signs**

91 Upon challenge with  $2.6 \times 10^6$  TCID<sub>50</sub> SARS-CoV-2 to both the upper and lower respiratory  
92 tract the average clinical score of control animals was higher compared to ChAdOx1 nCoV-19  
93 vaccinated animals. This was significantly different as determined via Mann-Whitney's rank's  
94 test on 3 and 5 DPI (Figure 3a). All control animals showed an increase in respiratory rate,  
95 compared to 3 out of 6 vaccinated animals. Respiratory signs persisted longer in control animals  
96 (Extended Data Table 1).

97

## 98 **Viral load in respiratory tract samples**

99 In the control animals, viral genomic RNA (gRNA) was detected in BAL fluid on all days and  
100 viral subgenomic RNA (sgRNA), indicative of virus replication, was detected at 3 and 5 days  
101 post inoculation (DPI). In contrast, viral gRNA was detected in only two animals, either on 3 or  
102 7 DPI, and no viral sgRNA could be detected in BAL fluid obtained from vaccinated animals  
103 ( $p=0.0119$ , Figure 3b). Viral gRNA was detected in nose swabs from all animals and no  
104 difference in viral load in nose swabs was found on any days between vaccinated and control  
105 animals (Figure 3c).

106

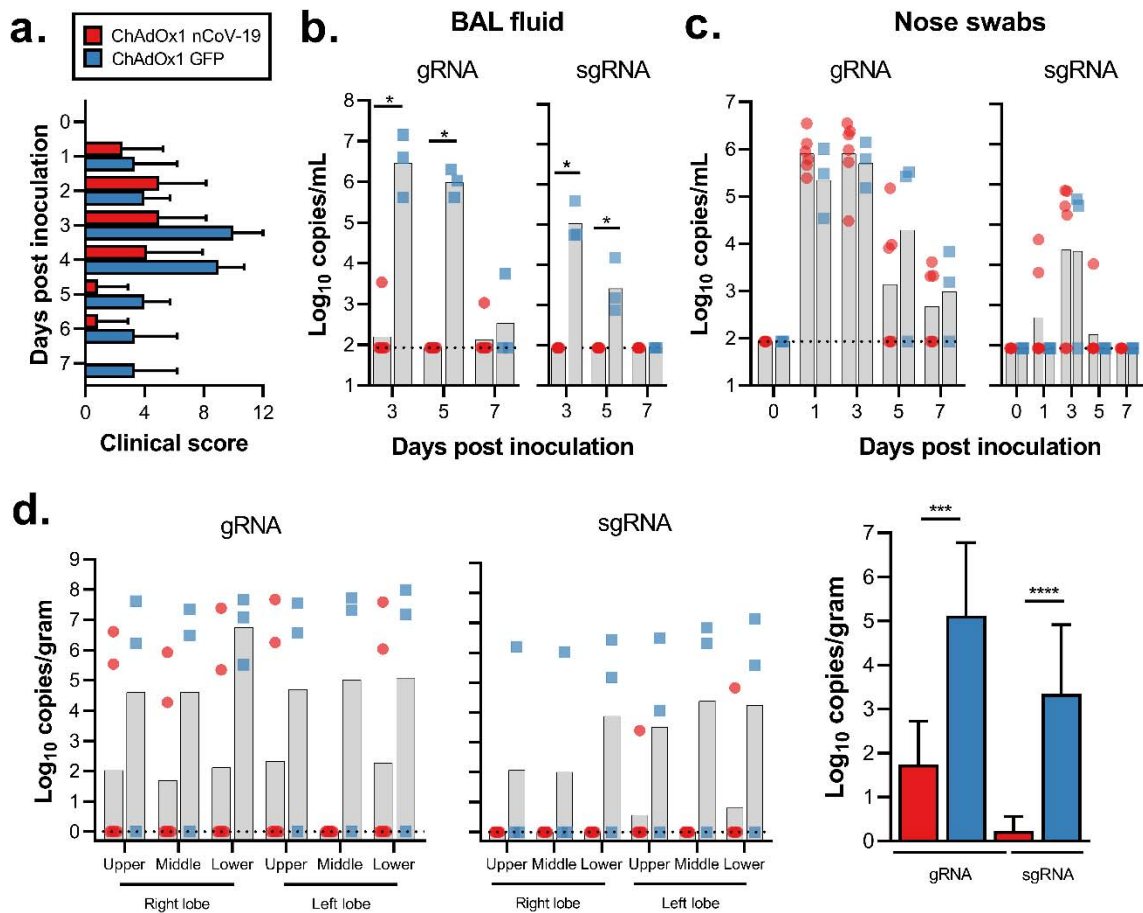

107

108 **Figure 3. Clinical signs and viral load in rhesus macaques inoculated with SARS-CoV-2**

109 **after vaccination with ChAdOx1 nCoV-19. a.** Mean clinical score with standard deviation in

110 NHPs. Any scoring associated with food was removed from final score. **b.** Viral load in BAL

111 fluid obtained from rhesus macaques, bar at geometric mean. \*=p-value<0.0166. **c.** Viral load in

112 nose swabs obtained from rhesus macaques, bar at geometric mean. **d.** Viral load in tissues at 7

113 DPI. Pictured are individual values with geometric mean bars (left panels) and geometric mean

114 of all lung lobes per group (right panel). \*\*\*=p-value<0.001; \*\*\*\*=p-value<0.0001. Vaccinated

115 animals = red circles; control animals = blue squares; dotted line = limit of detection.

116

117 **Cytokine response**

118 Cytokines in serum were analysed after challenge to monitor immune responses. We observed an  
119 upregulation in IFN- $\gamma$  at 1 DPI in ChAdOx1 nCoV-19 vaccinated animals, but not in control  
120 animals. No significant differences were observed between ChAdOx1 nCoV-19 and control  
121 animals for TNF- $\alpha$  , IL-2, IL-4, IL-6, and IL-10 (Extended Data Figure 2).

122

### 123 **Pulmonary pathology**

124 At 7 days post inoculation, all animals were euthanized, and tissues were collected. None of the  
125 vaccinated monkeys developed pulmonary pathology after inoculation with SARS-CoV-2. All  
126 lungs were histologically normal and no evidence of viral pneumonia nor immune-enhanced  
127 inflammatory disease was observed. In addition, no SARS-CoV-2 antigen was detected by  
128 immunohistochemistry in the lungs of any of the vaccinated animals. Two out of 3 control  
129 animals developed some degree of viral interstitial pneumonia. Lesions were widely separated  
130 and characterized by thickening of alveolar septae by small amounts of edema fluid and few  
131 macrophages and lymphocytes. Alveoli contained small numbers of pulmonary macrophages  
132 and, rarely, edema. Type II pneumocyte hyperplasia was observed. Multifocally, perivascular  
133 infiltrates of small numbers of lymphocytes forming perivascular cuffs were observed.  
134 Immunohistochemistry demonstrated viral antigen in type I and II pneumocytes, as well as in  
135 alveolar macrophages (Figure 4).



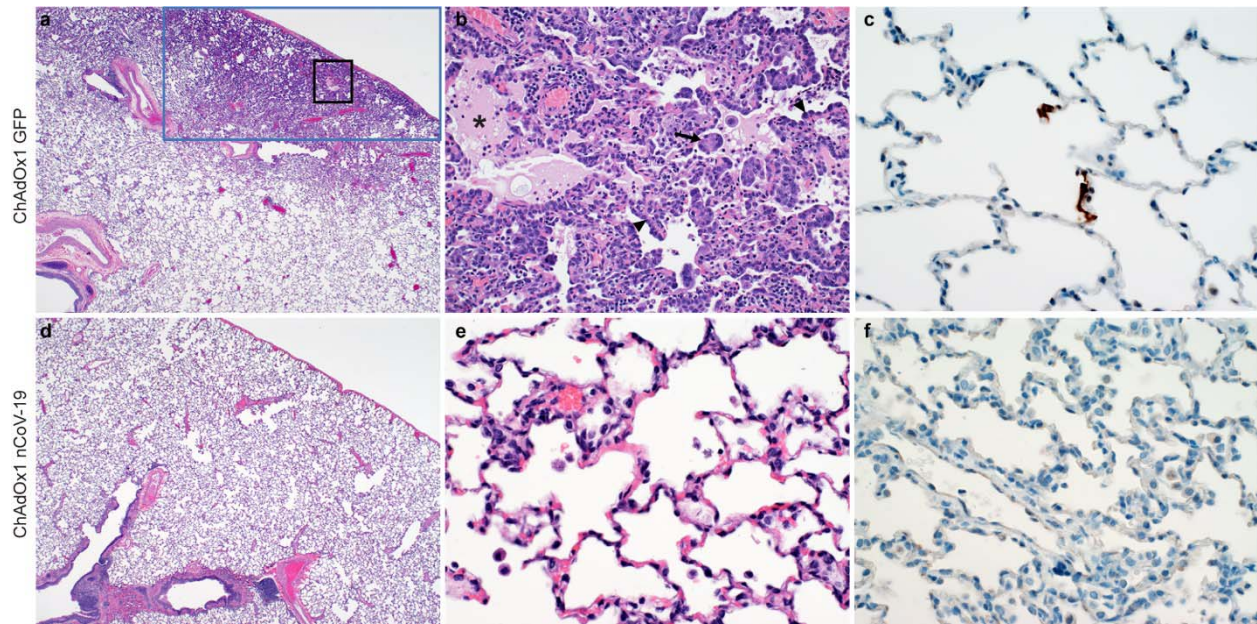

136

137 **Figure 4. Histological changes in lungs of rhesus macaques on 7 dpi.** a) Focal interstitial  
138 pneumonia in lungs of a control animal (blue box). The area in the black box is magnified in  
139 panel b. b) Interstitial pneumonia with edema (asterisk), type II pneumocyte hyperplasia  
140 (arrowhead) and syncytial cells (arrow) in control animals. c) SARS-CoV-2 antigen (visible as  
141 red-brown staining) was detected by immunohistochemistry in type I and type II pneumocytes in  
142 the lungs of control animals. d) No histological changes were observed in the lungs of ChadOx1  
143 nCoV-19-vaccinated animals. e) Higher magnification of lung tissue in panel d. No evidence of  
144 pneumonia or immune-enhanced inflammation is observed. f) No SARS-CoV-2 antigen was  
145 detected by immunohistochemistry in the lungs of vaccinated animals. Magnification: panels a, d  
146 40x; panels b, c, e, f 400x.

147

#### 148 **Viral load in respiratory tract**

149 Viral gRNA load was high in lung tissue of control animals and viral sgRNA was detected in 2  
150 out of 3 control animals (Figure 3d). In contrast, the viral gRNA load was significantly lower in  
151 lung tissue obtained from vaccinated animals as determined via Mann-Whitney's rank test and

152 below limits of detection in two vaccinated animals. Viral sgRNA was detected in lung tissue  
153 obtained from 1 out of 6 vaccinated animals ( $p < 0.0001$ , Figure 3d). Viral gRNA could be  
154 detected in other tissues but was low in both groups (Extended Data Figure 3).

155

## 156 **Discussion**

157 Here, we showed that a single vaccination with ChAdOx1 nCoV-19 is effective in preventing  
158 damage to the lungs upon high dose challenge with SARS-CoV-2. Similarly a recent study  
159 showed that a triple vaccination regime of a high dose of whole inactivated SARS-CoV-2  
160 protected rhesus macaques from SARS-CoV-2 pneumonia<sup>7</sup>.

161 Viral loads in BAL fluid and lung tissue of vaccinated animals were significantly reduced,  
162 suggesting that vaccination prevents virus replication in the lower respiratory tract. Despite this  
163 marked difference in virus replication in the lungs, reduction in viral shedding from the nose was  
164 not observed. However, animals were challenged with a high dose of virus via multiple routes,  
165 which likely does not reflect a realistic human exposure. Whether a lower challenge dose would  
166 result in more efficient protection of the upper respiratory tract remains to be determined.

167 Several preclinical studies of vaccines against SARS-CoV-1 resulted in immunopathology after  
168 vaccination and challenge, with more severe disease in vaccinated animals than in controls<sup>8-10</sup>.

169 Importantly, we did not see any evidence of immune-enhanced disease in vaccinated animals.

170 The immune response was not skewed towards a Th2 response in mice nor in NHPs, there was  
171 no increase in clinical signs or virus replication throughout the study in vaccinated NHPs  
172 compared to controls and no markers of disease enhancement in lung tissue of NHPs, such as an  
173 influx of neutrophils were observed. These data informed the start of the phase I clinical trial  
174 with ChAdOx1 nCoV-19 on April 23, 2020. As of May 13, 2020, more than 1000 volunteers

175 have participated in the clinical trials. This study is thus an important step towards the  
176 development of a safe and efficacious SARS-CoV-2 vaccine.

177

## 178 **References**

- 179 1 Zhu, N. *et al.* A Novel Coronavirus from Patients with Pneumonia in China, 2019. *N Engl J Med*  
180 **382**, 727-733, doi:10.1056/NEJMoa2001017 (2020).
- 181 2 Wu, F. *et al.* A new coronavirus associated with human respiratory disease in China. *Nature* **579**,  
182 265-269, doi:10.1038/s41586-020-2008-3 (2020).
- 183 3 WHO. *Coronavirus disease (COVID-19) Situation Report 113*,  
184 <[https://www.who.int/docs/default-source/coronaviruse/situation-reports/20200512-covid-19-](https://www.who.int/docs/default-source/coronaviruse/situation-reports/20200512-covid-19-sitrep-113.pdf?sfvrsn=feac3b6d_2)  
185 [sitrep-113.pdf?sfvrsn=feac3b6d\\_2](https://www.who.int/docs/default-source/coronaviruse/situation-reports/20200512-covid-19-sitrep-113.pdf?sfvrsn=feac3b6d_2)> (2020).
- 186 4 Lurie, N., Saville, M., Hatchett, R. & Halton, J. Developing Covid-19 Vaccines at Pandemic  
187 Speed. *N Engl J Med*, doi:10.1056/NEJMp2005630 (2020).
- 188 5 van Doremalen, N. *et al.* A single dose of ChAdOx1 MERS provides protective immunity in  
189 rhesus macaques. *Science Advances*, doi:10.1126/sciadv.aba8399 (2020).
- 190 6 Munster, V. J. *et al.* Respiratory disease in rhesus macaques inoculated with SARS-CoV-2.  
191 *Nature*, doi:10.1038/s41586-020-2324-7 (2020).
- 192 7 Qiang, G. *et al.* Development of an inactivated vaccine candidate for SARS-CoV-2. *Science*,  
193 doi:10.1126/science.abc1932 (2020).
- 194 8 Weingartl, H. *et al.* Immunization with modified vaccinia virus Ankara-based recombinant  
195 vaccine against severe acute respiratory syndrome is associated with enhanced hepatitis in ferrets.  
196 *J Virol* **78**, 12672-12676, doi:10.1128/JVI.78.22.12672-12676.2004 (2004).
- 197 9 Bolles, M. *et al.* A double-inactivated severe acute respiratory syndrome coronavirus vaccine  
198 provides incomplete protection in mice and induces increased eosinophilic proinflammatory  
199 pulmonary response upon challenge. *J Virol* **85**, 12201-12215, doi:10.1128/JVI.06048-11 (2011).
- 200 10 Liu, L. *et al.* Anti-spike IgG causes severe acute lung injury by skewing macrophage responses  
201 during acute SARS-CoV infection. *JCI Insight* **4**, doi:10.1172/jci.insight.123158 (2019).
- 202

## 203 **Methods**

### 204 **Ethics Statement**

205 Mice - Mice were used in accordance with the UK Animals (Scientific Procedures) Act under project  
206 license number P9804B4F1 granted by the UK Home Office. Animals were group housed in IVCs under  
207 SPF conditions, with constant temperature and humidity with lighting on a fixed light/dark cycle (12-  
208 hours/12-hours).

209 NHPs - Animal experiment approval was provided by the Institutional Animal Care and Use Committee  
210 (IACUC) at Rocky Mountain Laboratories. Animal experiments were executed in an Association for  
211 Assessment and Accreditation of Laboratory Animal Care (AALAC)-approved facility by certified staff,

212 following the basic principles and guidelines in the NIH Guide for the Care and Use of Laboratory  
213 Animals, the Animal Welfare Act, United States Department of Agriculture and the United States Public  
214 Health Service Policy on Humane Care and Use of Laboratory Animals. Rhesus macaques were housed in  
215 individual primate cages allowing social interactions, in a climate-controlled room with a fixed light/dark  
216 cycle (12-hours/12-hours) and monitored a minimum of twice daily. Commercial monkey chow, treats,  
217 and fruit were provided by trained personnel. Water was available ad libitum. Environmental enrichment  
218 consisted of a variety of human interaction, commercial toys, videos, and music. The Institutional  
219 Biosafety Committee (IBC) approved work with infectious SARS-CoV-2 virus strains under BSL3  
220 conditions. All sample inactivation was performed according to IBC approved standard operating  
221 procedures for removal of specimens from high containment.

#### 222 **Generation of vaccine ChAdOx1 nCoV-19**

223 The spike protein of SARS-CoV-2 (Genbank accession number YP\_009724390.1), the surface  
224 glycoprotein responsible for receptor binding and fusion/entry into the host cell, was codon optimised for  
225 expression in human cell lines and synthesised with the tissue plasminogen activator (tPA) leader  
226 sequence at the 5' end by GeneArt Gene Synthesis (Thermo Fisher Scientific). The sequence, encoding  
227 SARS-CoV-2 amino acids 2-1273 and tPA leader, was cloned into a shuttle plasmid using InFusion  
228 cloning (Clontech). The shuttle plasmid encodes a modified human cytomegalovirus major immediate  
229 early promoter (IE CMV) with tetracycline operator (TetO) sites, poly adenylation signal from bovine  
230 growth hormone (BGH), between Gateway® recombination cloning sites. ChAdOx1 nCoV-19 was  
231 prepared using Gateway® recombination technology (Thermo Fisher Scientific) between the shuttle  
232 plasmid described and the ChAdOx1 destination DNA BAC vector described in<sup>11</sup> resulting in the  
233 insertion of the SARS-CoV-2 expression cassette at the E1 locus. The ChAdOx1 adenovirus genome was  
234 excised from the BAC using unique PmeI sites flanking the adenovirus genome sequence. The virus was  
235 rescued and propagated in T-Rex 293 HEK cells (Invitrogen) which repress antigen expression during  
236 virus propagation. Purification was by CsCl gradient ultracentrifugation. Virus titers were determined by  
237 hexon immunostaining assay and viral particles calculated based on spectrophotometry<sup>12,13</sup>.

238 **Study design animal experiments**

239 Mice – Female BALB/cOlaHsd (BALB/c) (Envigo) and outbred CrI:CD1(ICR) (CD1) (Charles River)  
240 mice of at least 6 weeks of age, were immunized IM in the musculus tibialis with  $6 \times 10^9$  VP of ChAdOx1  
241 nCoV-19 unless otherwise stated.  
242 NHPs - 9 adult rhesus macaques (8M, 1F) were randomly divided into two groups of six and three  
243 animals. Group 1 was vaccinated with ChAdOx1 nCoV-19 at -28 DPI, group 2 was vaccinated with  
244 ChAdOx1 GFP at -28 DPI. All vaccinations were done with  $2.5 \times 10^{10}$  VP/animal diluted in sterile PBS.  
245 Blood samples were obtained before vaccination and 14 days thereafter. Animals were challenged with  
246 SARS-CoV-2 strain nCoV-WA1-2020 (MN985325.1) diluted in sterile DMEM on 0 DPI; with  
247 administration of 4 mL intratracheally, 1 mL intranasally, 1 mL orally and 0.5 mL ocularly of  $4 \times 10^5$   
248 TCID<sub>50</sub>/mL virus suspension. Animals were scored daily by the same person who was blinded to study  
249 group allocations using a standardized scoring sheet. Clinical exams were performed on -28, -14, 0, 1, 3,  
250 and 5 and 7 DPI. Nasal swabs and blood were collected at all exam dates. BAL was performed on 3, 5,  
251 and 7 DPI by insertion of an endotracheal tube and bronchoscope into the trachea, then past the 3<sup>rd</sup>  
252 bifurcation, and subsequent installation of 10 mL of sterile saline. Manual suction was applied to retrieve  
253 the BAL sample. Necropsy was performed on 7 DPI and the following tissues were collected: cervical  
254 lymph node, mediastinal lymph node, conjunctiva, nasal mucosa, oropharynx, tonsil, trachea, all six lung  
255 lobes, right and left bronchus, heart, liver, spleen, kidney, stomach, duodenum, jejunum, ileum, cecum,  
256 colon, urinary bladder.

257 **Cells and virus**

258 SARS-CoV-2 strain nCoV-WA1-2020 (MN985325.1) was provided by CDC, Atlanta, USA. Virus  
259 propagation was performed in VeroE6 cells in DMEM supplemented with 2% fetal bovine serum, 1 mM  
260 L-glutamine, 50 U/ml penicillin and 50 µg/ml streptomycin. VeroE6 cells were maintained in DMEM  
261 supplemented with 10% fetal bovine serum, 1 mM L-glutamine, 50 U/ml penicillin and 50 µg/ml  
262 streptomycin.

263 **Virus neutralization assay**



264 Sera were heat-inactivated (30 min, 56 °C), two-fold serial dilutions were prepared in 2% DMEM and  
265 100 TCID<sub>50</sub> of SARS-CoV-2 was added. After 1hr incubation at 37 °C and 5% CO<sub>2</sub>, virus:serum mixture  
266 was added to VeroE6 cells and incubated at 37°C and 5% CO<sub>2</sub>. At 5 dpi, cytopathic effect was scored.  
267 The virus neutralization titer was expressed as the reciprocal value of the highest dilution of the serum  
268 which still inhibited virus replication.

#### 269 **RNA extraction and quantitative reverse-transcription polymerase chain reaction**

270 Tissues (up to 30 mg) were homogenized in RLT buffer and RNA was extracted using the RNeasy kit  
271 (Qiagen) according to the manufacturer's instructions. RNA was extracted from BAL fluid and nasal  
272 swabs using the QiaAmp Viral RNA kit (Qiagen) according to the manufacturer's instructions. Viral  
273 gRNA<sup>14</sup> and sgRNA<sup>15</sup> specific assays were used for the detection of viral RNA. Five µl RNA was tested  
274 with the Rotor-Gene™ probe kit (Qiagen) according to instructions of the manufacturer. Dilutions of  
275 SARS-CoV-2 standards with known genome copies were run in parallel.

#### 276 **Enzyme-linked immunosorbent assay for mouse sera**

277 MaxiSorp plates (Nunc) were coated with S1 or S2 (The Native Antigen Company; 50 ng/well) in PBS  
278 for overnight adsorption at 4°C. Plates were washed in PBS/Tween (0.05% v/v) and wells blocked using  
279 casein (ThermoFisher Scientific) for 1hr at RT. Serially diluted mouse serum samples were added and  
280 incubated overnight at 4°C. Plates were washed and Alkaline Phosphatase-conjugated goat anti-mouse  
281 IgG (Sigma) was added to all wells for 1hr at RT. After washing pNPP substrate (Sigma) was added.  
282 Optical density (OD) values for each well were measured at 405 nm. Endpoint titers were calculated as  
283 follows: the log<sub>10</sub> OD against log<sub>10</sub> sample dilution was plotted and a regression analysis of the linear part  
284 of this curve allowed calculation of the endpoint titer with an OD of three times the background. The  
285 same calculation was used for diluting the sera to the same amounts of total IgG for further testing on  
286 different IgG subclasses with anti-mouse IgG subclass-specific antibodies (Abcam). The results of the  
287 IgG subclass ELISA are presented using OD values.

#### 288 **Enzyme-linked immunosorbent assay for NHP sera**

289 Stabilized SARS-CoV-2 spike protein was obtained from the Vaccine Research Centre, Bethesda, USA.  
290 Maxisorp plates (Nunc) were coated overnight at 4°C with 100 ng/well spike protein in PBS. Plates were  
291 blocked with 100 µl of casein in PBS (Thermo Fisher) for 1hr at RT. Serum serially diluted 2x in casein  
292 in PBS was incubated at RT for 1hr. Antibodies were detected using affinity-purified polyclonal antibody  
293 peroxidase-labeled goat-anti-monkey IgG (Seracare, 074-11-021) in casein and TMB 2-component  
294 peroxidase substrate (Seracare, 5120-0047), developed for 5-10 min, and reaction was stopped using stop  
295 solution (Seracare, 5150-0021) and read at 450 nm. All wells were washed 4x with PBST 0.1% tween in  
296 between steps. Threshold for positivity was set at 3x OD value of negative control (serum obtained from  
297 non-human primates prior to start of the experiment) or 0.2, whichever one was higher.

### 298 **ELISpot assay and ICS analysis**

299 Single cell suspension of murine splenocytes were prepared by passing cells through 70µM cell strainers  
300 and ACK lysis prior to resuspension in complete media. Rhesus macaque PBMCs were isolated from  
301 ethylene diamine tetraaceticacid (EDTA) whole blood using Leucosep™ tubes (Greiner Bio-one  
302 International GmbH) and Histopaque®-1077 density gradient cell separation medium (Sigma-Aldrich)  
303 according to the manufacturers' instructions.

304 Mice - For analysis of IFN-γ production by ELISpot, cells were stimulated with pools of S1 or S2  
305 peptides (final concentration of 2µg/ml) on IPVH-membrane plates (Millipore) coated with 5µg/ml anti-  
306 mouse IFN-γ (AN18). After 18-20 hours of stimulation, IFN-γ spot forming cells (SFC) were detected by  
307 staining membranes with anti-mouse IFN-γ biotin (1µg/ml) (R46A2) followed by streptavidin-Alkaline  
308 Phosphatase (1µg/ml) and development with AP conjugate substrate kit (BioRad, UK).

309 For analysis of intracellular cytokine production, cells were stimulated at 37°C for 6 hours with 2µg/ml S1  
310 or S2 pools of peptide, media or cell stimulation cocktail (containing PMA-Ionomycin, Biolegend),  
311 together with 1µg/ml Golgi-plug (BD) with the addition of 2µl/ml CD107a-Alexa647. Cell supernatant  
312 was collected and frozen at -20°C for subsequent analysis by MesoScaleDiscovery (MSD) assay (see  
313 below). Following surface staining with CD4-BUV496, CD8-PerCPCy5.5, CD62L-BV711 and CD127-

314 BV650, cells were fixed with 4% paraformaldehyde and stained intracellularly with TNF- $\alpha$ -A488, IL-2-  
315 PECy7, IL-4-BV605, IL-10-PE and IFN- $\gamma$ -e450 diluted in Perm-Wash buffer (BD).  
316 Sample acquisition was performed on a Fortessa (BD) and data analyzed in FlowJo v9 or FlowJo V10  
317 (TreeStar). An acquisition threshold was set at a minimum of 5000 events in the live CD3<sup>+</sup> gate. Antigen  
318 specific T cells were identified by gating on LIVE/DEAD negative, doublet negative (FSC-H vs FSC-A),  
319 size (FSC-H vs SSC), CD3<sup>+</sup>, CD4<sup>+</sup> or CD8<sup>+</sup> cells and cytokine positive. Cytokine positive responses are  
320 presented after subtraction of the background response detected in the corresponding unstimulated sample  
321 (media containing CD107a and Golgi-plug) of each individual spleen sample.  
322 NHPs - IFN- $\gamma$  ELISpot assay of PBMCs was performed using the ImmunoSpot® Human IFN-  $\gamma$  Single-  
323 Color Enzymatic ELISpot Assay Kit according to the manufacturer's protocol (Cellular Technology  
324 Limited). PBMCs were plated at a concentration of 100,000 cells per well and were stimulated with four  
325 contiguous peptide pools spanning the length of the SARS-CoV-2 spike protein sequence at a  
326 concentration of 2  $\mu$ g/mL per peptide (Mimotopes). ELISpot plates were subjected to overnight formalin  
327 inactivation prior to removal from BSL4 for reading. Analysis was performed using the CTL  
328 ImmunoSpot® Analyzer and ImmunoSpot® Software (Cellular Technology Limited). Spot forming units  
329 (SFU) per  $1.0 \times 10^6$  PBMCs were summed across the 4 peptide pools for each animal.

### 330 **Measurement of cytokines and chemokines**

331 Mouse samples were assayed using MSD Technology V-PLEX Mouse Cytokine 29-Plex kit according to  
332 the manufacturer's instructions. Non-human primate samples were inactivated with  $\gamma$ -radiation (2 MRad)  
333 according to standard operating procedures and assayed on a Bio-Plex 200 instrument (Bio-Rad) using the  
334 Non-Human Primate Cytokine MILLIPLEX map 23-plex kit (Millipore) according to the manufacturer's  
335 instructions. LLOD was used for all undetectable and extrapolated values. Only data for cytokines  
336 consistently above the lower limit of quantification were included in further analyses.

337  $\text{Log}_{10}$  Fold Change ( $\text{Log}_{10}\text{FC}$ ) for mouse samples was calculated as follows:

$$338 \text{Log}_{10}\text{FC} = \text{Log}_{10}((\text{Stimulated (pg/ml)} + 1) / (\text{Unstimulated (pg/ml)} + 1))$$



339 Fold change for NHP samples was calculated as follows:

340  $FC = \text{Concentration (pg/mL) on DX (1, 3, 5, or 7)} / \text{Concentration (pg/mL) on D0}$

### 341 **Histology and immunohistochemistry**

342 Necropsies and tissue sampling were performed according to IBC-approved protocols. Lungs were  
343 perfused with 10% formalin and processed for histologic review. Harvested tissues were fixed for eight  
344 days in 10% neutral-buffered formalin, embedded in paraffin, processed using a VIP-6 Tissue Tek  
345 (Sakura Finetek, USA) tissue processor, and embedded in Ultraffin paraffin polymer (Cancer Diagnostics,  
346 Durham, NC). Samples were sectioned at 5  $\mu\text{m}$ , and resulting slides were stained with hematoxylin and  
347 eosin. Specific anti-CoV immunoreactivity was detected using an in-house SARS-CoV-2 nucleocapsid  
348 protein rabbit antibody (Genscript) at a 1:1000 dilution. The IHC assay was carried out on a Discovery  
349 ULTRA automated staining instrument (Roche Tissue Diagnostics) with a Discovery ChromoMap DAB  
350 (Ventana Medical Systems) kit. All tissue slides were evaluated by a board-certified veterinary anatomic  
351 pathologist blinded to study group allocations.

### 352 **Statistical analyses**

353 Two-tailed Mann-Whitney's rank tests were conducted to compare differences between groups. A  
354 Bonferroni correction was used to control for type I error rate where required.

### 355 **Data availability**

356 Data have been deposited in Figshare: 10.6084/m9.figshare.12290696

357

### 358 **References**

- 359
- 360 11 Dicks, M. D. *et al.* A novel chimpanzee adenovirus vector with low human seroprevalence:  
361 improved systems for vector derivation and comparative immunogenicity. *PLoS One* **7**, e40385,  
362 doi:10.1371/journal.pone.0040385 (2012).
  - 363 12 Bewig, B. & Schmidt, W. E. Accelerated titering of adenoviruses. *Biotechniques* **28**, 870-873,  
364 doi:10.2144/00285bm08 (2000).
  - 365 13 Maizel, J. V., Jr., White, D. O. & Scharff, M. D. The polypeptides of adenovirus. I. Evidence for  
366 multiple protein components in the virion and a comparison of types 2, 7A, and 12. *Virology* **36**,  
367 115-125, doi:10.1016/0042-6822(68)90121-9 (1968).
  - 368 14 Corman, V. M. *et al.* Detection of 2019 novel coronavirus (2019-nCoV) by real-time RT-PCR.  
369 *Euro Surveill* **25**, doi:10.2807/1560-7917.ES.2020.25.3.2000045 (2020).

370 15 Wolfel, R. *et al.* Virological assessment of hospitalized patients with COVID-2019. *Nature*,  
371 doi:10.1038/s41586-020-2196-x (2020).

372

### 373 **Acknowledgements**

374 The authors would like to acknowledge Olubukola Abiona, Brandon Bailes, Aaron Carmody, Kizzmekia  
375 Corbett, Kathleen Cordova, Jayne Faris, Heinz Feldmann, Susan Gerber, Barney Graham, Elaine  
376 Haddock, Ryan Kissinger, Michael Jones, Mary Marsh, Kay Menk, Anita Mora, Stephanie Seifert, Les  
377 Shupert, Brian Smith, Natalie Thornburg, Amanda Weidow, Marissa Woods, and Kwe Claude Yinda for  
378 their contributions to this study. This work was supported by the Intramural Research Program of the  
379 National Institute of Allergy and Infectious Diseases (NIAID), National Institutes of Health (NIH)  
380 (1ZIAAI001179-01) and the Department of Health and Social Care using UK Aid funding managed by  
381 the NIHR.

382

### 383 **Author Information**

#### 384 **Author contributions**

385 NvD, TL, SG and VJM designed the study; NvD, TL, AS, SBR, JNP, JRP, VA, TB, AF, MU, FF, EA,  
386 HS, JS, MH, AO, KMW, LPP, CB, CG, BNW, RR, DL, AI, RK, LR, SM, CP, JL, PH, DS, GS, EdW,  
387 SG, VJM acquired, analysed and interpreted the data; NvD, TL, EdW, SG, and VJM wrote the  
388 manuscript. All authors have approved the submitted version.

#### 389 **Corresponding author**

390 Correspondence to Vincent Munster, [vincent.munster@nih.gov](mailto:vincent.munster@nih.gov) or Sarah Gilbert,

391 [sarah.gilbert@ndm.ox.ac.uk](mailto:sarah.gilbert@ndm.ox.ac.uk)

392

#### 393 **Competing interests**

394 SCG is a board member of Vaccitech and named as an inventor on a patent covering use of ChAdOx1-  
395 vectored vaccines and a patent application covering a SARS-CoV-2 (nCoV-19) vaccine. Teresa Lambe is

396 named as an inventor on a patent application covering a SARS-CoV-2 (nCoV-19) vaccine. The remaining  
397 authors declare no competing interests.

398

### 399 Extended Data Legends

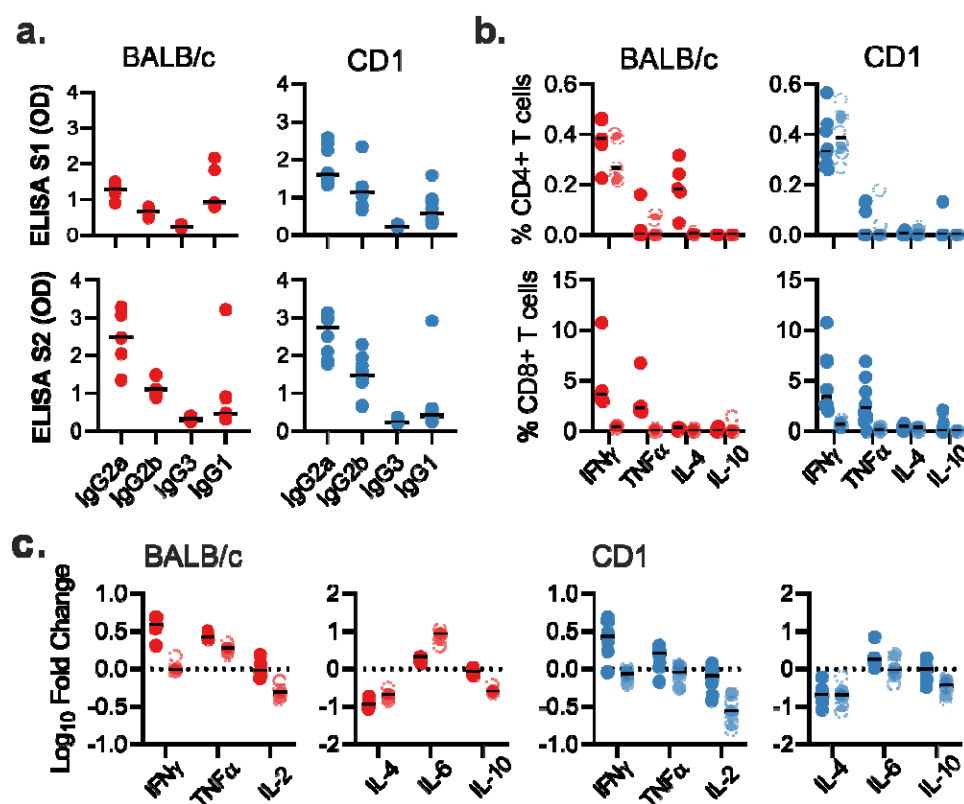

400

### 401 Extended Data Figure 1. Antigen specific responses following ChAdOx1 nCov19

402 vaccination.

403 a. IgG subclass antibodies detected against S1 or S2 protein in sera of BALB/c or CD1 mice. b.

404 Frequency of cytokine positive CD4+ or CD8+ T cells following stimulation of splenocytes with

405 S1 pool (dark) or S2 pool (transparent) peptides in BALB/c (red) and CD1 (blue) mice. d. Log<sub>10</sub>

406 fold change in cytokine levels in supernatant from S1 (dark) and S2 (transparent) stimulated

407 splenocytes when compared to corresponding unstimulated splenocyte sample for BALB/c and  
408 CD1 mice.

409 **Extended Data Table 1. Clinical signs observed in rhesus macaques inoculated with SARS-CoV-2**

| Animal | Treatment | D0     | D1          | D2                            | D3                                | D4                                        | D5                 | D6        | D7        |
|--------|-----------|--------|-------------|-------------------------------|-----------------------------------|-------------------------------------------|--------------------|-----------|-----------|
| 1      | Vaccine   | Normal | Normal      | Normal                        | Normal                            | Normal                                    | Normal             | Normal    | Normal    |
| 2      | Vaccine   | Normal | Normal      | Dyspnea with abdominal effort | Dyspnea with abdominal effort     | Normal                                    | Normal             | Normal    | Normal    |
| 3      | Vaccine   | Normal | Normal      | Dyspnea with abdominal effort | Dyspnea with abdominal effort     | Dyspnea with abdominal effort             | Normal             | Normal    | Normal    |
| 4      | Vaccine   | Normal | Normal      | Tachypnea                     | Tachypnea                         | Tachypnea                                 | Tachypnea          | Tachypnea | Normal    |
| 5      | Vaccine   | Normal | Tachypnea   | Tachypnea                     | Tachypnea                         | Tachypnea                                 | Normal             | Normal    | Normal    |
| 6      | Vaccine   | Normal | Ruffled fur | Tachypnea, ruffled fur        | Tachypnea, ruffled fur            | Tachypnea, ruffled fur                    | Normal             | Normal    | Normal    |
| 7      | Control   | Normal | Normal      | Diarrhoea                     | Tachypnea, ruffled fur, diarrhoea | Dyspnea, ruffled fur, diarrhoea, red nose | Dyspnea, diarrhoea | Normal    | Normal    |
| 8      | Control   | Normal | Dyspnea     | Tachypnea                     | Tachypnea, pale appearance        | Tachypnea, pale appearance                | Tachypnea          | Tachypnea | Tachypnea |
| 9      | Control   | Normal | Dyspnea     | Tachypnea, ruffled fur        | Tachypnea, ruffled fur            | Tachypnea, ruffled fur                    | Tachypnea          | Tachypnea | Tachypnea |

410

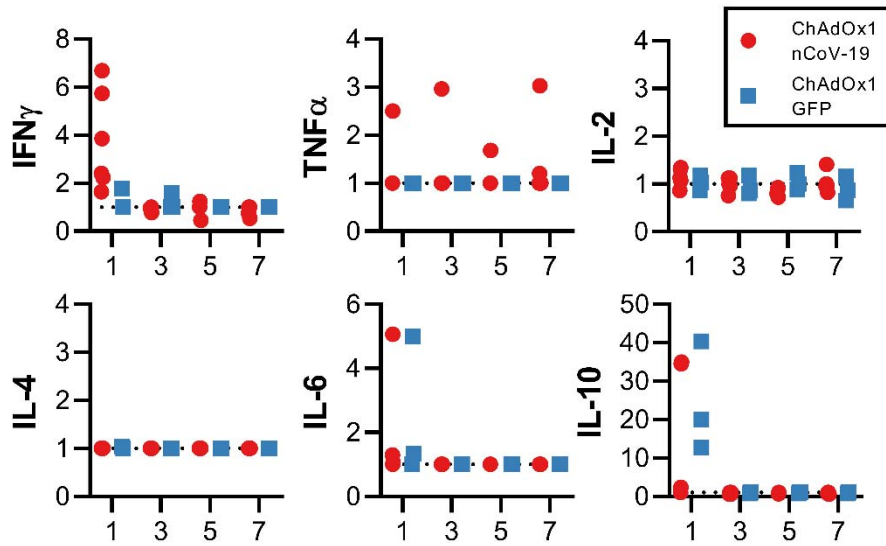

411

412 **Extended Data Figure 2. Serum cytokines in rhesus macaques challenged with SARS-CoV-2. Fold**

413 increase in cytokines in serum compared to 0 DPI values.

414

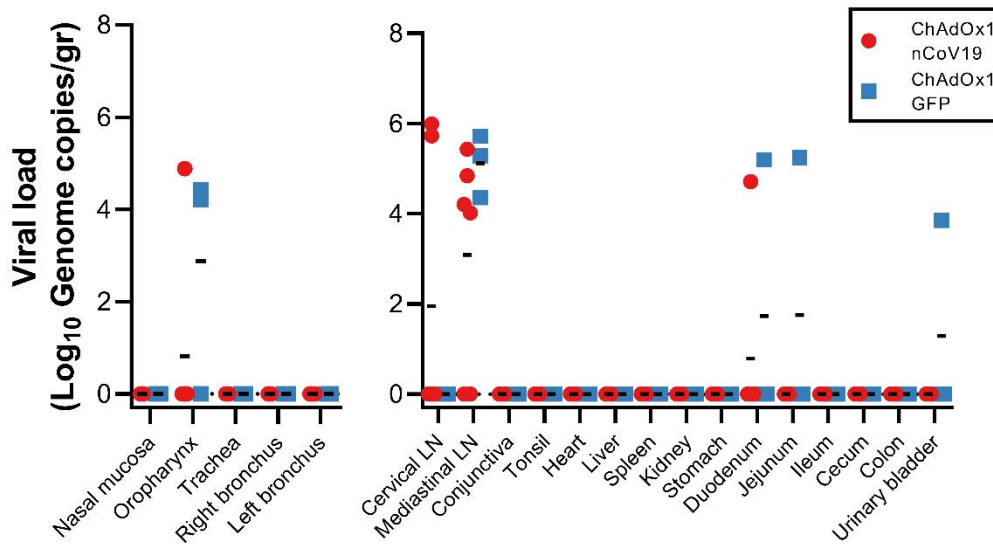

415

416 **Extended Data Figure 3. Viral load in rhesus macaques challenged with SARS-CoV-2**

417 Viral genomic RNA in respiratory tissues excluding lung tissue (left panel) and other tissues (right panel).

418 A two-tailed Mann-Whitney's rank test was performed to investigate statistical significance. Bonferroni

419 correction was applied, and thus statistical significance was reached at  $p > 0.0125$ .
